August 2013

# PSYCHIATRIC SERVICES

A Journal of the  
American Psychiatric  
Association

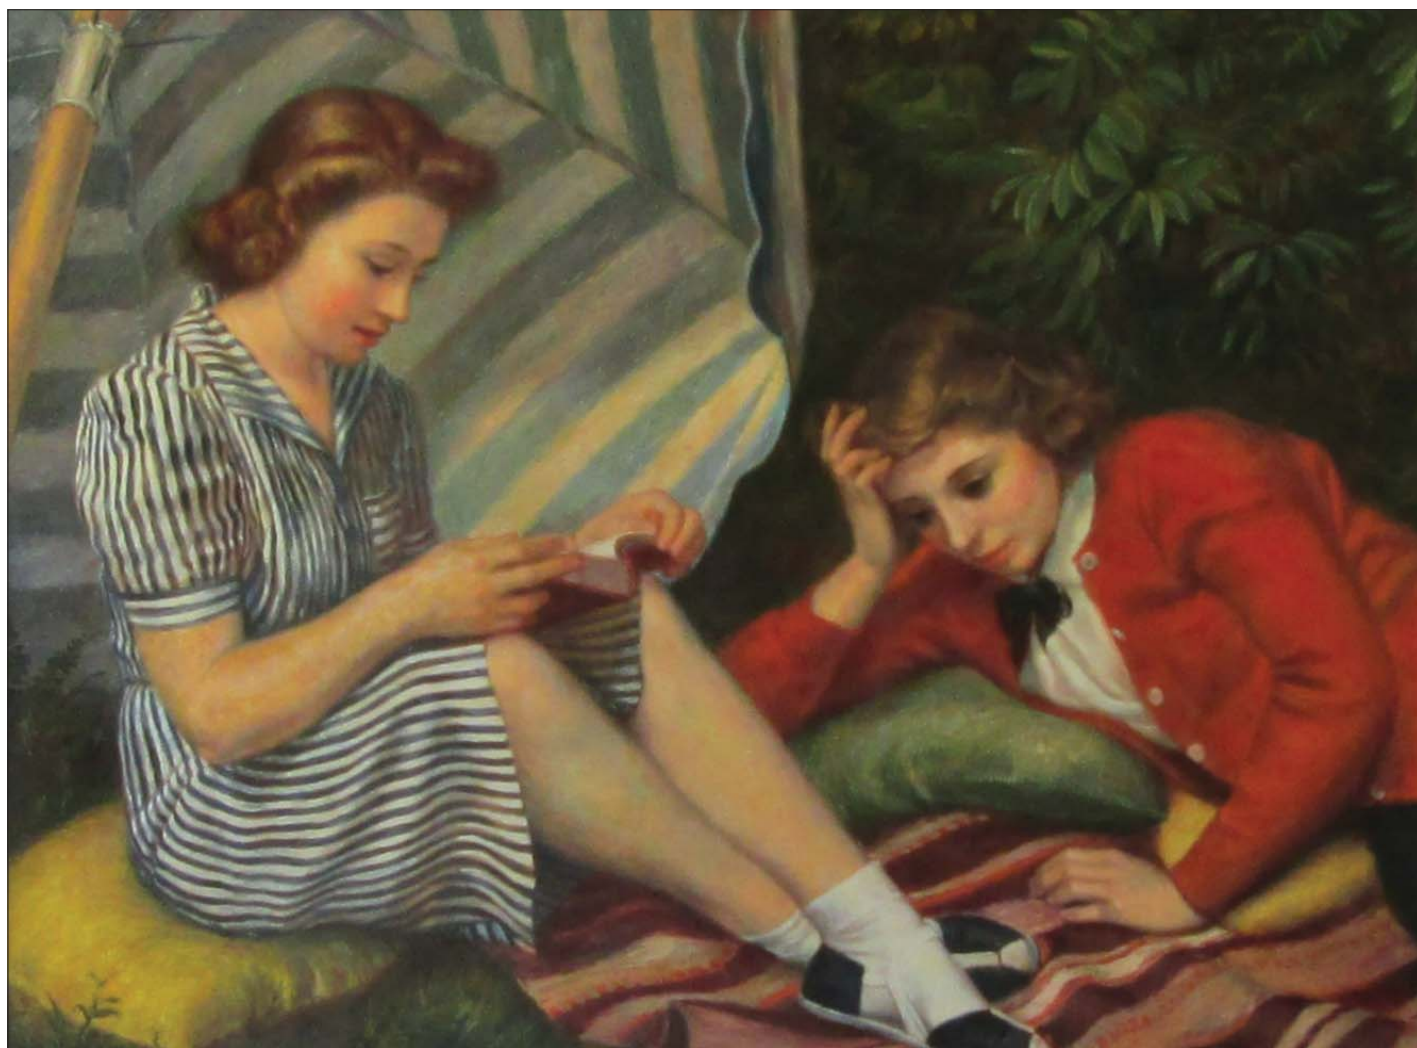

◆ New Column Examines Integrated Approaches in 21st Century Health Care

◆ What Consumers Want to Learn About Their Illness: Surveying Information Needs

◆ Environmental Challenges in the Neighborhoods of Adults With Serious Mental Illness
